# Supplementary material
Source: Springer Nature journal article supplement (https://www.springermedizin.de/resource/supplementary/13000_2012_686_MOESM1_ESM.pdf/9624872)

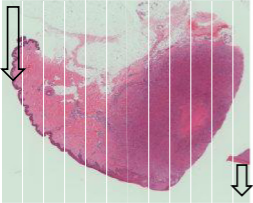

**Line scanning**

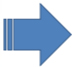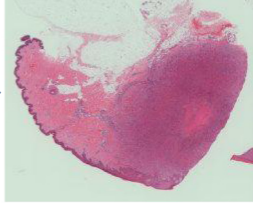

**Reconstructed  
image**

Supplement: MOESM1 [file 9624872]
